# Supplementary material for: Control of optical and electrical properties of nanosheets by the chemical structure of the turning point in a foldable polymer
Source: Royal Society of Chemistry journal article supplement (doi:10.1039/c6nr01066k), 2016-01-01
Supplement: c6nr01066k1.pdf [file c6nr01066k1.pdf]

# Control of optical and electrical properties of nanosheets by chemical structure of turning point in foldable polymer

T. Ikeda\*, H. Tamura, T. Sakurai, S. Seki

## Supplementary Information

### Table of contents

|                                                           |     |
|-----------------------------------------------------------|-----|
| 1. Synthesis of precursor oligomers                       | S2  |
| 2. <sup>1</sup> H and <sup>13</sup> C NMR of the products | S11 |
| 3. MALDI-TOF MS of oligomers                              | S18 |
| 4. Fluorescence spectra of meta-linked oligomers          | S19 |
| 5. AFM images of <i>o</i> -6mer and <i>m</i> -6mer        | S19 |
| 6. FP-TRMC results of triazole-linked-8mer samples        | S20 |

| Correspondence Address                                                                                                                                       |
|--------------------------------------------------------------------------------------------------------------------------------------------------------------|
| <p>Dr. Taichi Ikeda</p> <p>Research Center for Functional Materials<br/>National Institute for Materials Science<br/>Namiki 1-1, 305-0044 Tsukuba, JAPAN</p> |

## 1. Synthesis of precursor oligomers

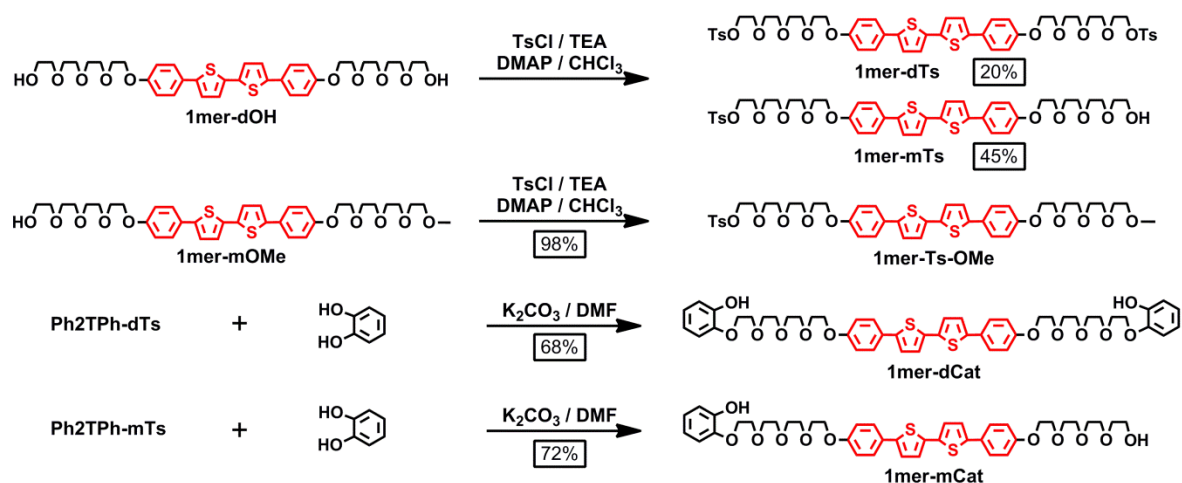

**Scheme S1.** Synthesis of functionalized monomers to build up *ortho*-linked oligomers

**1mer-dTs and 1mer-mTs:** **1mer-dOH** (4.2 g, 6.0 mmol), triethylamine (TEA, 1.0 mL, 7.2 mmol) and *N,N*-dimethyl-4-aminopyridine (DMAP, 0.1 g, 0.82 mmol) were dissolved in dry  $\text{CHCl}_3$  (80 mL). After adding *p*-toluenesulfonyl chloride (TsCl, 1.2 g, 6.3 mmol), the reaction mixture was stirred at 40 °C for 16 h under  $\text{N}_2$  atmosphere. The solution was concentrated by evaporation. The concentrated solution was added dropwise to  $\text{Et}_2\text{O}$  (200 mL). The precipitate was recovered by filtration. The products were separated by column chromatography ( $\text{SiO}_2$ ,  $\text{CHCl}_3 \rightarrow \text{CHCl}_3/\text{MeOH} = 94:6$ ). The products were obtained as yellow solids.

**1mer-dTs:** Yield: 1.2 g (20 %).  $^1\text{H}$  NMR (400 MHz,  $\text{CDCl}_3$ ):  $\delta = 2.43$  (s, 6H), 3.60 (s, 8H), 3.63–3.75 (m, 12H), 3.87 (t,  $J = 4.8$  Hz, 4H), 4.15 (m, 8H), 6.92 (d,  $J = 8.8$  Hz, 4H), 7.11 (s, 4H), 7.32 (d,  $J = 7.6$  Hz, 4H), 7.51 (d,  $J = 8.8$  Hz, 4H) 7.79 (d,  $J = 7.6$  Hz, 4H);  $^{13}\text{C}$  NMR (100 MHz,  $\text{CDCl}_3$ ):  $\delta = 22.0, 67.9, 69.0, 69.6, 70.1, 70.9, 71.0, 71.1, 71.2, 115.4, 123.1, 124.6, 127.2, 127.4, 128.3, 130.2, 133.3, 136.2, 143.2, 145.1, 158.8$ ; MS (MALDI): found  $m/z = 1009.63$ ;  $\text{C}_{50}\text{H}_{58}\text{O}_{14}\text{S}_4$  requires 1010.27.

**1mer-mTs:** Yield: 2.3 g (45 %).  $^1\text{H}$  NMR (400 MHz,  $\text{CDCl}_3$ ):  $\delta = 2.43$  (s, 3H), 2.53(br, 1H), 3.57–3.76 (m, 22H), 3.87 (m, 4H), 4.16 (m, 6H), 6.93 (m, 4H), 7.11 (s, 4H), 7.32 (d,  $J = 8.0$  Hz, 2H), 7.51 (m, 4H), 7.79 (d,  $J = 8.0$  Hz, 2H);  $^{13}\text{C}$  NMR (100 MHz,  $\text{CDCl}_3$ ):  $\delta = 22.0, 62.1, 67.9, 69.0, 69.6, 70.1, 70.7, 70.8\text{--}71.3, 72.8, 123.1, 124.6, 127.2, 127.4, 128.3, 130.2, 133.3, 136.2, 143.2, 145.1, 158.8$ ; MS (MALDI): found  $m/z = 855.64$ ;  $\text{C}_{43}\text{H}_{52}\text{O}_{12}\text{S}_3$  requires 856.26.

**1mer-Ts-OMe:** **1mer-mOMe** (2.1 g, 2.9 mmol), TEA (0.50 mL, 3.6 mmol) and DMAP (50 mg, 0.41 mmol) were dissolved in dry  $\text{CHCl}_3$  (40 mL). After adding TsCl (0.70 g, 3.7 mmol), the reaction mixture was stirred at room temperature for 16 h under  $\text{N}_2$  atmosphere. The

solution was concentrated by evaporation. The concentrated solution was added dropwise to Et<sub>2</sub>O (200 mL). The precipitate was recovered by filtration. The product was purified by column chromatography (SiO<sub>2</sub>, CHCl<sub>3</sub> → CHCl<sub>3</sub>/MeOH = 95:5). The product was obtained as yellow solid. Yield: 2.5 g (98 %) <sup>1</sup>H NMR (400 MHz, CDCl<sub>3</sub>): δ = 2.43 (s, 3H), 3.37 (s, 3H), 3.54 (m, 2H), 3.59 (s, 4H), 3.62–3.76 (m, 16H), 3.87 (m, 4H), 4.15 (m, 6H), 6.93 (d, *J* = 8.8 Hz, 4H), 7.11 (s, 4H), 7.32 (d, *J* = 8.0 Hz, 2H), 7.50 (d, *J* = 8.8 Hz, 4H), 7.78 (d, *J* = 8.0 Hz, 2H); <sup>13</sup>C NMR (100 MHz, CDCl<sub>3</sub>): δ = 22.0, 59.4, 67.9, 69.0, 69.6, 70.0, 70.9–71.2, 72.3, 115.4, 123.1, 124.5, 127.2, 127.4, 128.3, 130.2, 133.3, 136.2, 143.2, 145.1, 158.8; MS (MALDI): found *m/z* = 870.13; C<sub>44</sub>H<sub>54</sub>O<sub>12</sub>S<sub>3</sub> requires 870.28.

**1mer-dCat: 1mer-dTs** (1.5 g, 1.5 mmol), catechol (3.3 g, 30 mmol) and K<sub>2</sub>CO<sub>3</sub> (0.5 g, 3.6 mmol) were mixed in dry DMF (15 mL). The reaction mixture was stirred at 80 °C for 16 h under N<sub>2</sub> atmosphere. After adding CHCl<sub>3</sub> (200 mL), the organic layer was washed with 1N NaCl aqueous solutions (200 mL × 3). The solution was dried with MgSO<sub>4</sub>, filtrated and concentrated by evaporation. The concentrated solution was added dropwise to Et<sub>2</sub>O (200 mL). The precipitate was recovered by filtration. The product was purified by the preparative HPLC (Linearly connected columns of JAIGEL-1H and JAIGEL-2H, CHCl<sub>3</sub>) to give the product as yellow solid. Yield: 0.89 g (68 %) <sup>1</sup>H NMR (400 MHz, CDCl<sub>3</sub>): δ = 3.66–3.77 (m, 16H), 3.81 (m, 4H), 3.87 (t, *J* = 4.8 Hz, 4H), 4.15 (m, 8H), 6.77–6.84 (m, 2H), 6.84–6.94 (m, 11H), 7.11 (s, 4H), 7.49 (d, *J* = 8.8 Hz, 4H); <sup>13</sup>C NMR (100 MHz, CDCl<sub>3</sub>): δ = 67.8, 69.8, 70.0, 70.4, 70.8, 71.0, 71.2, 115.4, 115.8, 116.0, 120.2, 123.0, 123.4, 124.5, 127.1, 127.4, 136.2, 143.2, 146.3, 147.9, 158.8; MS (MALDI): found *m/z* = 885.85; C<sub>48</sub>H<sub>54</sub>O<sub>12</sub>S<sub>2</sub> requires 886.31.

**1mer-mCat: 1mer-mTs** (1.5 g, 1.7 mmol), catechol (1.9 g, 17 mmol) and K<sub>2</sub>CO<sub>3</sub> (0.5 g, 3.6 mmol) were mixed in dry DMF (15 mL). The reaction mixture was stirred at 80 °C for 16 h under N<sub>2</sub> atmosphere. After adding CHCl<sub>3</sub> (200 mL), the organic layer was washed with 1N NaCl aqueous solutions (200 mL × 3). The solution was dried with MgSO<sub>4</sub>, filtrated and concentrated by evaporation. The concentrated solution was added dropwise to Et<sub>2</sub>O (200 mL). The precipitate was recovered by filtration. The product was purified by the preparative HPLC (Linearly connected columns of JAIGEL-1H and JAIGEL-2H, CHCl<sub>3</sub>) to give the product as yellow solid. Yield: 1.0 g (72 %) <sup>1</sup>H NMR (400 MHz, CDCl<sub>3</sub>): δ = 2.62 (t, *J* = 6.0 Hz, 1H), 3.61 (t, *J* = 5.2 Hz, 2H), 3.64–3.77 (m, 18H), 3.81 (m, 2H), 3.87 (t, *J* = 4.8 Hz, 4H), 4.15 (m, 6H), 6.76–6.82 (m, 1H), 6.87–6.97 (m, 8H), 7.11 (s, 4H), 7.50 (m, 4H); <sup>13</sup>C NMR

(100 MHz, CDCl<sub>3</sub>):  $\delta$  = 62.1, 67.8, 67.9, 69.9, 70.0, 70.1, 70.2, 70.7, 70.8, 71.0, 71.2, 72.9, 115.4, 115.6, 116.0, 120.2, 123.0, 123.3, 124.5, 127.2, 127.4, 127.5, 136.2, 143.2, 146.3, 147.9, 158.8; MS (MALDI): found  $m/z$  = 793.97; C<sub>42</sub>H<sub>50</sub>O<sub>11</sub>S<sub>2</sub> requires 794.28.

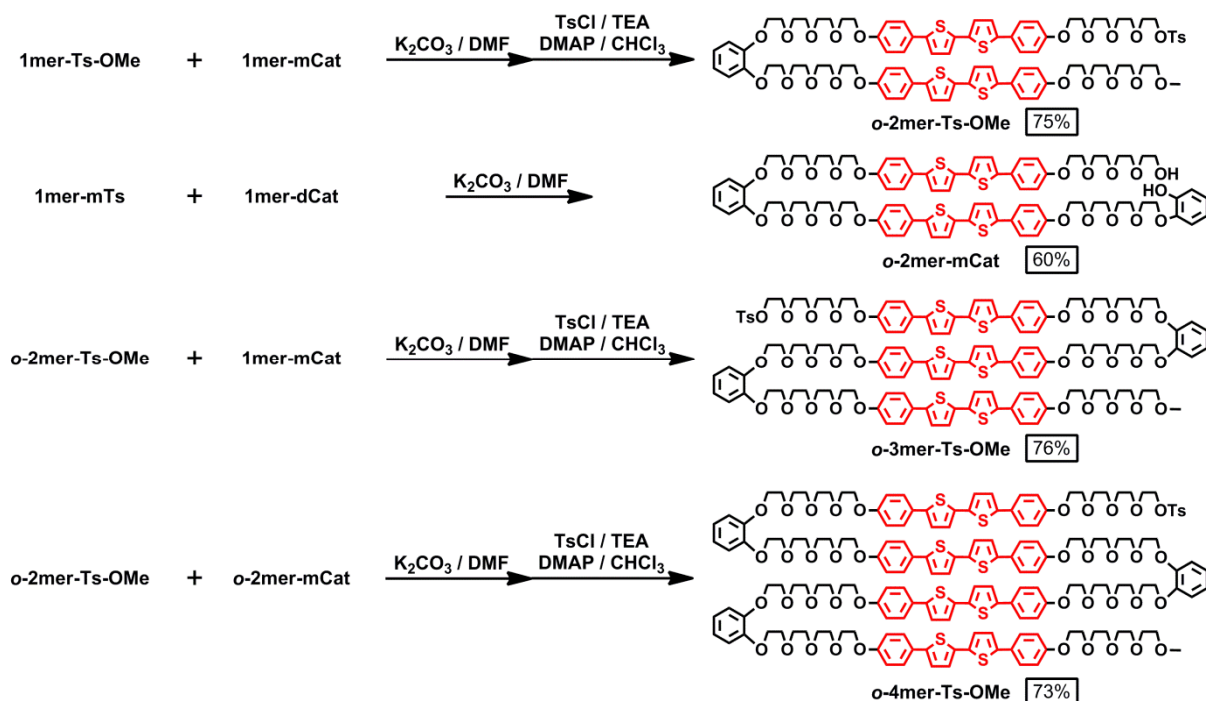

**Scheme S2.** Synthesis of functionalized precursors to build up *ortho*-linked oligomers

***o*-2mer-Ts-OMe:** 1mer-Ts-OMe (0.60 g, 0.69 mmol), 1mer-mCat (0.53 g, 0.67 mmol) and K<sub>2</sub>CO<sub>3</sub> (0.10 g, 0.72 mmol) were mixed in dry DMF (5 mL). The reaction mixture was stirred at 80 °C for 16 h under N<sub>2</sub> atmosphere. The product was precipitated by adding Et<sub>2</sub>O (80 mL). The precipitate was recovered by filtration. The product was dissolved in CHCl<sub>3</sub> then insoluble materials were removed by filtration. The solvent was removed by evaporation. The yellow solid was dissolved in CHCl<sub>3</sub> (5.0 mL) with TEA (0.25 mL, 1.8 mmol) and DMAP (0.05 g, 0.41 mmol). After adding TsCl (0.30 g, 1.6 mmol), the reaction mixture was stirred at room temperature for 16 h under N<sub>2</sub> atmosphere. The product was precipitated by adding Et<sub>2</sub>O (80 mL). The precipitate was recovered by filtration. The product was purified by the preparative HPLC (Linearly connected columns of JAIGEL-1H and JAIGEL-2H, CHCl<sub>3</sub>) to give the product as yellow solid. Yield: 0.82 g (75 %) <sup>1</sup>H NMR (400 MHz, CDCl<sub>3</sub>):  $\delta$  = 2.43 (s, 3H), 3.37 (s, 3H), 3.54 (t,  $J$  = 4.8 Hz, 2H), 3.59 (s, 4H), 3.62–3.76 (m, 32H), 3.85 (m, 12H), 4.15 (m, 14H), 6.87–6.95 (m, 12H), 7.10 (s, 8H), 7.32 (d,  $J$  = 8.0 Hz, 2H), 7.49 (m, 8H); <sup>13</sup>C NMR (100 MHz, CDCl<sub>3</sub>):  $\delta$  = 22.0, 59.4, 67.9, 69.0, 69.2, 69.6, 70.0, 70.1, 70.8–71.2, 72.3,

115.2, 115.4, 122.0, 123.1, 124.5, 127.2, 127.4, 128.3, 130.2, 133.3, 136.2, 143.2, 145.1, 149.3, 158.8; MS (MALDI): found  $m/z = 1646.15$ ;  $C_{86}H_{102}O_{22}S_5$  requires 1646.55.

***o*-2mer-mCat:** **1mer-mTs** (0.24 g, 0.28 mmol), **1mer-dCat** (0.50 g, 0.56 mmol) and  $K_2CO_3$  (0.10 g, 0.72 mmol) were mixed in dry DMF (4 mL). The reaction mixture was stirred at 80 °C for 16 h under  $N_2$  atmosphere. The product was precipitated by adding  $Et_2O$  (80 mL). The precipitate was recovered by filtration. The product was dissolved in mixed solvent of  $CHCl_3/MeOH$  (19/1), then insoluble materials were removed by filtration. The solution was concentrated by evaporation. The product was purified by the preparative HPLC (Linearly connected columns of JAIGEL-1H and JAIGEL-2H,  $CHCl_3$ ) to give the product as yellow solid. Yield: 0.26 g (60 %)  $^1H$  NMR (400 MHz,  $CDCl_3$ ):  $\delta = 2.66$  (br, 1H), 3.61 (t,  $J = 4.8$  Hz, 2H), 3.65–3.77 (m, 34H), 3.81 (m, 2H), 3.85 (m, 12H), 4.14 (m, 14H), 6.79 (m, 1H), 6.87–6.95 (m, 15H), 7.05–7.12 (m, 9H), 7.49 (m, 8H);  $^{13}C$  NMR (100 MHz,  $CDCl_3$ ):  $\delta = 62.1$ , 67.8, 69.2, 69.9, 70.0, 70.1, 70.7, 70.8, 70.9, 71.0, 71.2, 115.2, 115.4, 116.1, 120.1, 122.0, 123.1, 123.3, 124.5, 127.2, 127.4, 136.2, 143.2, 146.4, 147.9, 149.3, 158.8; MS (MALDI): found  $m/z = 1569.62$ ;  $C_{84}H_{98}O_{21}S_4$  requires 1570.55.

***o*-3mer-Ts-OMe:** ***o*-2mer-Ts-OMe** (0.26 g, 0.16 mmol), **1mer-mCat** (0.13 g, 0.16 mmol) and  $K_2CO_3$  (0.05 g, 0.36 mmol) were mixed in dry DMF (2 mL). The reaction mixture was stirred at 80 °C for 16 h under  $N_2$  atmosphere. The product was precipitated by adding  $Et_2O$  (80 mL). The precipitate was recovered by filtration. The product was dissolved in  $CHCl_3$  then insoluble materials were removed by filtration. The solvent was removed by evaporation. The yellow solid was dissolved in  $CHCl_3$  (5.0 mL) with TEA (0.15 mL, 1.1 mmol) and DMAP (0.03 g, 0.25 mmol). After adding  $TsCl$  (0.15 g, 0.78 mmol), the reaction mixture was stirred at room temperature for 16 h under  $N_2$  atmosphere. The product was precipitated by adding  $Et_2O$  (80 mL). The precipitate was recovered by filtration. The product was purified by the preparative HPLC (Linearly connected columns of JAIGEL-1H and JAIGEL-2H,  $CHCl_3$ ) to give the product as yellow solid. Yield: 0.29 g (76 %)  $^1H$  NMR (400 MHz,  $CDCl_3$ ):  $\delta = 2.42$  (s, 3H), 3.37 (s, 3H), 3.54 (m, 2H), 3.59 (s, 4H), 3.62–3.76 (m, 48H), 3.85 (m, 20H), 4.14 (m, 22H), 6.87–6.94 (m, 20H), 7.09 (s, 12H), 7.31 (d,  $J = 8.0$  Hz, 2H), 7.49 (m, 12H), 7.78 (d,  $J = 8.0$  Hz, 2H);  $^{13}C$  NMR (100 MHz,  $CDCl_3$ ):  $\delta = 22.0$ , 59.4, 67.9, 69.0, 69.2, 69.6, 70.0, 70.1, 70.8–71.2, 72.3, 115.2, 115.4, 122.0, 123.1, 124.5, 127.2, 127.4, 128.3, 130.2, 133.3, 136.2, 143.2, 145.1, 149.3, 158.8; MS (MALDI): found  $m/z = 2423.07$ ;  $C_{128}H_{150}O_{32}S_7$  requires 2423.82.

***o*-4mer-Ts-OMe: *o*-2mer-Ts-OMe** (0.24 g, 0.15 mmol), ***o*-2mer-mCat** (0.24 g, 0.15 mmol) and  $K_2CO_3$  (0.10 g, 0.72 mmol) were mixed in dry DMF (3 mL). The reaction mixture was stirred at 80 °C for 16 h under  $N_2$  atmosphere. The product was precipitated by adding  $Et_2O$  (80 mL). The precipitate was recovered by filtration. The product was dissolved in  $CHCl_3$  then insoluble materials were removed by filtration. The solvent was removed by evaporation. The yellow solid was dissolved in  $CHCl_3$  (5.0 mL) with TEA (0.10 mL, 0.72 mmol) and DMAP (0.02 g, 0.16 mmol). After adding TsCl (0.10 g, 0.52 mmol), the reaction mixture was stirred at room temperature for 16 h under  $N_2$  atmosphere. The product was precipitated by adding  $Et_2O$  (80 mL). The precipitate was recovered by filtration. The product was purified by the preparative HPLC (Linearly connected columns of JAIGEL-1H and JAIGEL-2H,  $CHCl_3$ ) to give the product as yellow solid. Yield: 0.34 g (73 %)  $^1H$  NMR (400 MHz,  $CDCl_3$ ):  $\delta$  = 2.43 (s, 3H), 3.37 (s, 3H), 3.54 (m, 2H), 3.59 (s, 4H), 3.62–3.76 (m, 66H), 3.85 (m, 28H), 4.14 (m, 28H), 6.86–6.96 (m, 28H), 7.09 (m, 16H), 7.32 (d,  $J$  = 8.4 Hz, 2H), 7.49 (m, 16H), 7.79 (d,  $J$  = 8.4 Hz, 2H);  $^{13}C$  NMR (100 MHz,  $CDCl_3$ ):  $\delta$  = 22.0, 59.4, 67.9, 69.0, 69.2, 69.6, 70.0, 70.1, 70.8–71.4, 72.3, 115.2, 115.4, 122.0, 123.1, 124.5, 127.1, 127.4, 128.3, 130.2, 133.3, 136.2, 143.1, 145.1, 149.3, 158.8; MS (MALDI): found  $m/z$  = 3201.79;  $C_{170}H_{198}O_{42}S_9$  requires 3201.09.

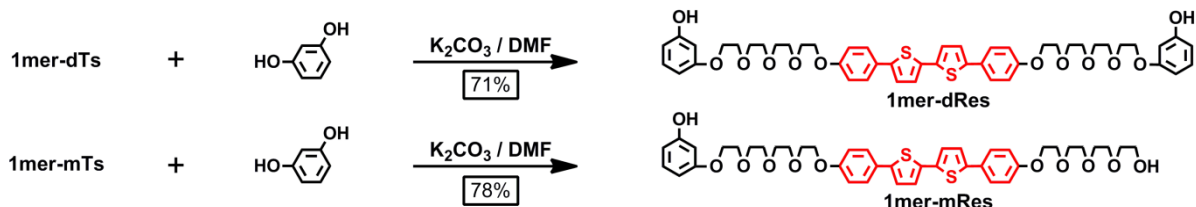

**Scheme S3.** Synthesis of functionalized monomers to build up *meta*-linked oligomers

**1mer-dRes:** **1mer-dTs** (1.5 g, 1.5 mmol), resorcinol (3.3 g, 30 mmol) and  $K_2CO_3$  (0.5 g, 3.6 mmol) were mixed in dry DMF (15 mL). The reaction mixture was stirred at 80 °C for 16 h under  $N_2$  atmosphere. After adding  $CHCl_3$  (200 mL), the organic layer was washed with 1N NaCl aqueous solutions (200 mL  $\times$  3). The solution was dried with  $MgSO_4$ , filtrated and concentrated by evaporation. The concentrated solution was added dropwise to  $Et_2O$  (200 mL). The precipitate was recovered by filtration. The product was purified by the preparative HPLC (Linearly connected columns of JAIGEL-1H and JAIGEL-2H,  $CHCl_3/MeOH$  = 97/3) to give the product as yellow solid. Yield: 0.93 g (71 %)  $^1H$  NMR (400 MHz,  $CDCl_3/DMSO-d_6$  = 40/1):  $\delta$  = 3.62–3.72 (m, 16H), 3.76–3.85 (m, 8H), 4.05 (m, 4H), 4.11 (m, 4H), 6.37 (d,  $J$

= 8.0 Hz, 2H), 6.42 (m, 4H), 6.88 (d,  $J = 8.8$  Hz, 4H), 7.03 (t,  $J = 8.0$  Hz, 2H), 7.07 (s, 4H), 7.46 (d  $J = 8.8$  Hz, 4H), 8.16 (br, 2H);  $^{13}\text{C}$  NMR (100 MHz,  $\text{CDCl}_3$ ):  $\delta = 67.6, 67.8, 69.9, 70.0, 70.9, 71.1, 102.6, 106.3, 108.6, 115.3, 123.0, 124.5, 127.1, 127.3, 130.1, 136.1, 143.1, 158.4, 158.7, 160.2$ ; MS (MALDI): found  $m/z = 885.85$ ;  $\text{C}_{48}\text{H}_{54}\text{O}_{12}\text{S}_2$  requires 886.31.

**1mer-mRes: 1mer-mTs** (1.5 g, 1.7 mmol), resorcinol (1.9 g, 17 mmol) and  $\text{K}_2\text{CO}_3$  (0.5 g, 3.6 mmol) were mixed in dry DMF (15 mL). The reaction mixture was stirred at 80 °C for 16 h under  $\text{N}_2$  atmosphere. After adding  $\text{CHCl}_3$  (200 mL), the organic layer was washed with 1N NaCl aqueous solutions (200 mL  $\times$  3). The solution was dried with  $\text{MgSO}_4$ , filtrated and concentrated by evaporation. The concentrated solution was added dropwise to  $\text{Et}_2\text{O}$  (200 mL). The precipitate was recovered by filtration. The product was purified by the preparative HPLC (Linearly connected columns of JAIGEL-1H and JAIGEL-2H,  $\text{CHCl}_3/\text{MeOH} = 97/3$ ) to give the product as yellow solid. Yield: 1.1 g (78 %)  $^1\text{H}$  NMR (400 MHz,  $\text{CDCl}_3/\text{DMSO}-d_6 = 40/1$ ):  $\delta = 2.99$  (br, 1H), 3.58 (m, 2H), 3.63–3.73 (m, 18H), 3.79 (t,  $J = 4.8$  Hz, 2H), 3.84 (m, 4H), 4.05 (t,  $J = 4.8$  Hz, 2H), 4.13 (m, 4H), 6.36–6.45 (m, 3H), 6.90 (m, 4H), 7.03 (t,  $J = 8.0$  Hz, 1H), 7.08 (s, 4H), 7.47 (m, 4H), 8.06 (s, 1H);  $^{13}\text{C}$  NMR (100 MHz,  $\text{CDCl}_3$ ):  $\delta = 61.9, 67.6, 67.8, 69.9, 70.0, 70.5, 70.7\text{--}71.2, 72.9, 102.6, 106.3, 108.6, 115.3, 123.0, 124.5, 127.1, 127.4, 130.1, 136.1, 143.1, 158.4, 158.7, 160.3$ ; MS (MALDI): found  $m/z = 793.88$ ;  $\text{C}_{42}\text{H}_{50}\text{O}_{11}\text{S}_2$  requires 794.28.

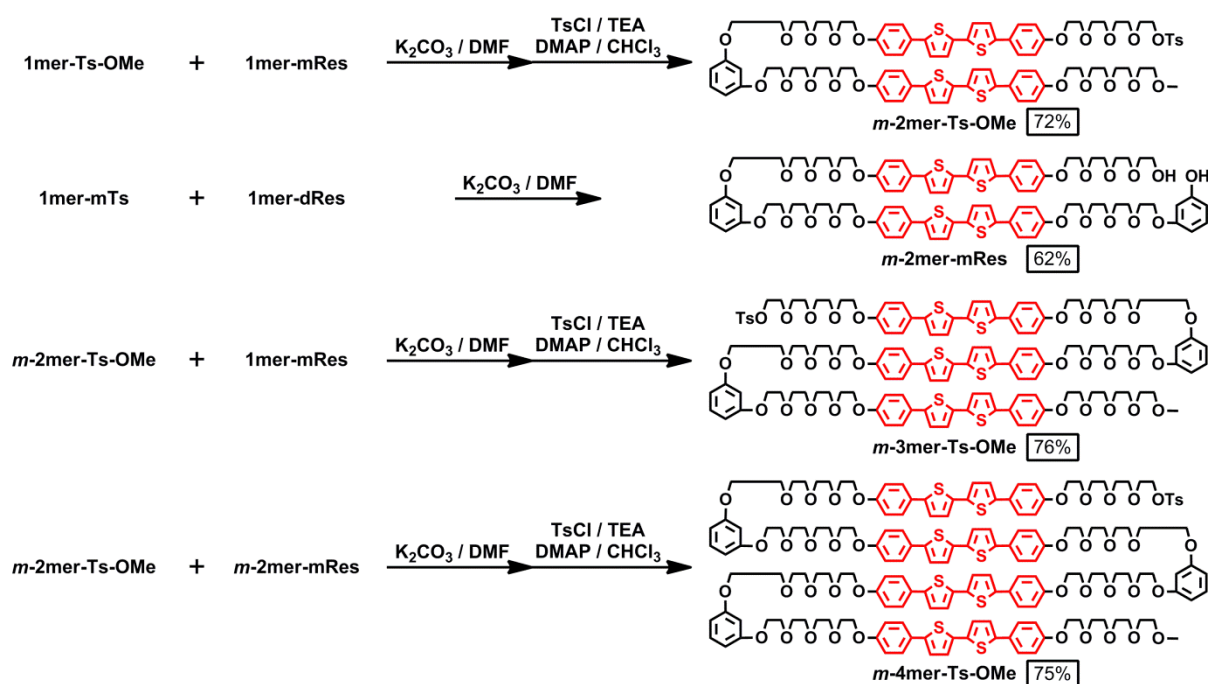

**Scheme S4.** Synthesis of functionalized precursors to build up *meta*-linked oligomers

***m*-2mer-Ts-OMe: 1mer-Ts-OMe** (0.60 g, 0.69 mmol), **1mer-mRes** (0.53 g, 0.67 mmol) and  $K_2CO_3$  (0.10 g, 0.72 mmol) were mixed in dry DMF (5 mL). The reaction mixture was stirred at 80 °C for 16 h under  $N_2$  atmosphere. The product was precipitated by adding  $Et_2O$  (80 mL). The precipitate was recovered by filtration. The product was dissolved in  $CHCl_3$  then insoluble materials were removed by filtration. The solvent was removed by evaporation. The yellow solid was dissolved in  $CHCl_3$  (5.0 mL) with TEA (0.25 mL, 1.8 mmol) and DMAP (0.05 g, 0.41 mmol). After adding TsCl (0.30 g, 1.6 mmol), the reaction mixture was stirred at room temperature for 16 h under  $N_2$  atmosphere. The product was precipitated by adding  $Et_2O$  (80 mL). The precipitate was recovered by filtration. The products were roughly purified by column chromatography ( $SiO_2$ ,  $CHCl_3 \rightarrow CHCl_3/MeOH = 95:5$ ). The product was purified by the preparative HPLC (Linearly connected columns of JAIGEL-1H and JAIGEL-2H,  $CHCl_3$ ) to give the product as yellow solid. Yield: 0.79 g (72 %).  $^1H$  NMR (400 MHz,  $CDCl_3$ ):  $\delta = 2.43$  (s, 3H), 3.37 (s, 3H), 3.54 (m, 2H), 3.60 (s, 4H), 3.63–3.76 (m, 32H), 3.81–3.89 (m, 12H), 4.08 (m, 4H), 4.15 (m, 10H), 6.48–6.52 (m, 3H), 6.92 (m, 8H), 7.08–7.16 (m, 9H), 7.32 (d,  $J = 7.6$  Hz, 2H), 7.50 (m, 8H), 7.79 (d,  $J = 7.6$  Hz, 2H);  $^{13}C$  NMR (100 MHz,  $CDCl_3$ ):  $\delta = 22.0, 59.4, 67.7, 67.9, 69.0, 69.6, 70.0, 70.8-71.3, 72.3, 102.1, 107.4, 115.4, 123.1, 124.6, 127.2, 127.4, 128.3, 130.2, 133.3, 136.2, 143.2, 145.1, 158.9, 160.3$ ; MS (MALDI): found  $m/z = 1646.86$ ;  $C_{86}H_{102}O_{22}S_5$  requires 1646.55.

***m*-2mer-mRes: 1mer-mTs** (0.24 g, 0.28 mmol), **1mer-dRes** (0.50 g, 0.56 mmol) and  $K_2CO_3$  (0.10 g, 0.72 mmol) were mixed in dry DMF (4 mL). The reaction mixture was stirred at 80 °C for 16 h under  $N_2$  atmosphere. The product was precipitated by adding  $Et_2O$  (80 mL). The precipitate was recovered by filtration. The product was dissolved in mixed solvent of  $CHCl_3/MeOH$  (19/1), then insoluble materials were removed by filtration. The solution was concentrated by evaporation. The products were roughly purified by column chromatography ( $SiO_2$ ,  $CHCl_3 \rightarrow CHCl_3/MeOH = 95:5$ ). The product was purified by the preparative HPLC (Linearly connected columns of JAIGEL-1H and JAIGEL-2H,  $CHCl_3$ ) to give the product as yellow solid. Yield: 0.27 g (62 %).  $^1H$  NMR (400 MHz,  $CDCl_3$ ):  $\delta = 2.65$  (br, 1H), 3.61 (t,  $J = 4.6$  Hz, 2H), 3.65–3.76 (m, 34H), 3.79–3.89 (m, 14H), 4.08 (m, 6H), 4.14 (m, 8H), 5.67 (s, 1H), 6.41–6.52 (m, 6H), 6.92 (m, 8H), 7.06–7.16 (m, 10H), 7.50 (m, 8H);  $^{13}C$  NMR (100 MHz,  $CDCl_3$ ):  $\delta = 62.1, 67.7, 67.9, 70.0, 70.7, 70.9-71.3, 72.9, 102.1, 102.9, 107.4, 108.5, 115.4, 123.1, 124.6, 127.2, 127.4, 130.2, 130.4, 136.2, 143.2, 158.8, 160.3$ ; MS (MALDI): found  $m/z = 1570.09$ ;  $C_{84}H_{98}O_{21}S_4$  requires 1570.55.



***m*-3mer-Ts-OMe**: ***m*-2mer-Ts-OMe** (0.26 g, 0.16 mmol), **1mer-mRes** (0.13 g, 0.16 mmol) and  $K_2CO_3$  (0.05 g, 0.36 mmol) were mixed in dry DMF (2 mL). The reaction mixture was stirred at 80 °C for 16 h under  $N_2$  atmosphere. The product was precipitated by adding  $Et_2O$  (80 mL). The precipitate was recovered by filtration. The product was dissolved in  $CHCl_3$  then insoluble materials were removed by filtration. The solvent was removed by evaporation. The yellow solid was dissolved in  $CHCl_3$  (5.0 mL) with TEA (0.15 mL, 1.1 mmol) and DMAP (0.03 g, 0.25 mmol). After adding TsCl (0.15 g, 0.78 mmol), the reaction mixture was stirred at room temperature for 16 h under  $N_2$  atmosphere. The product was precipitated by adding  $Et_2O$  (80 mL). The precipitate was recovered by filtration. The products were roughly purified by column chromatography ( $SiO_2$ ,  $CHCl_3 \rightarrow CHCl_3/MeOH = 95:5$ ). The product was purified by the preparative HPLC (Linearly connected columns of JAIGEL-1H and JAIGEL-2H,  $CHCl_3$ ) to give the product as yellow solid. Yield: 0.29 g (76 %).  $^1H$  NMR (400 MHz,  $CDCl_3$ ):  $\delta = 2.43$  (s, 3H), 3.37 (s, 3H), 3.54 (m, 2H), 3.59 (s, 4H), 3.62–3.78 (m, 48H), 3.80–3.90 (m, 20H), 4.08 (m, 8H), 4.14 (m, 14H), 6.48–6.52 (m, 6H), 6.92 (m, 12H), 7.08–7.16 (m, 14H), 7.32 (d,  $J = 8.0$  Hz, 2H), 7.50 (m, 12H), 7.79 (d,  $J = 8.0$  Hz, 2H);  $^{13}C$  NMR (100 MHz,  $CDCl_3$ ):  $\delta = 22.0, 59.4, 67.7, 67.9, 69.0, 69.6, 70.0, 70.8-71.3, 72.3, 102.1, 107.4, 115.4, 123.1, 124.5, 127.2, 127.4, 128.3, 130.2, 133.3, 136.2, 143.2, 145.1, 158.8, 160.3$ ; MS (MALDI): found  $m/z = 2423.16$ ;  $C_{128}H_{150}O_{32}S_7$  requires 2423.82.

***m*-4mer-Ts-OMe**: ***m*-2mer-Ts-OMe** (0.24 g, 0.15 mmol), ***m*-2mer-mRes** (0.24 g, 0.15 mmol) and  $K_2CO_3$  (0.10 g, 0.72 mmol) were mixed in dry DMF (3 mL). The reaction mixture was stirred at 80 °C for 16 h under  $N_2$  atmosphere. The product was precipitated by adding  $Et_2O$  (80 mL). The precipitate was recovered by filtration. The product was dissolved in  $CHCl_3$  then insoluble materials were removed by filtration. The solvent was removed by evaporation. The yellow solid was dissolved in  $CHCl_3$  (5.0 mL) with TEA (0.10 mL, 0.72 mmol) and DMAP (0.02 g, 0.16 mmol). After adding TsCl (0.10 g, 0.52 mmol), the reaction mixture was stirred at room temperature for 16 h under  $N_2$  atmosphere. The product was precipitated by adding  $Et_2O$  (80 mL). The precipitate was recovered by filtration. The products were roughly purified by column chromatography ( $SiO_2$ ,  $CHCl_3 \rightarrow CHCl_3/MeOH = 95:5$ ). The product was purified by the preparative HPLC (Linearly connected columns of JAIGEL-1H and JAIGEL-2H,  $CHCl_3$ ) to give the product as yellow solid. Yield: 0.35 g (75 %).  $^1H$  NMR (400 MHz,  $CDCl_3$ ):  $\delta = 2.42$  (s, 3H), 3.37 (s, 3H), 3.54 (t,  $J = 4.8$  Hz, 2H), 3.59 (s, 4H), 3.63–3.77 (m, 64H), 3.80–3.89 (m, 28H), 4.08 (m, 12H), 4.14 (m, 18H),

6.47–6.52 (m, 9H), 6.91 (m, 16H), 7.07–7.16 (m, 19H), 7.31 (d,  $J = 8.0$  Hz, 2H), 7.50 (m, 16H), 7.79 (d,  $J = 8.0$  Hz, 2H);  $^{13}\text{C}$  NMR (100 MHz,  $\text{CDCl}_3$ ):  $\delta = 22.0, 59.4, 67.7, 67.9, 69.0, 69.6, 70.0, 70.7\text{--}71.3, 72.3, 102.1, 107.4, 115.4, 123.1, 124.5, 127.1, 127.4, 128.3, 130.1, 133.3, 136.2, 143.2, 145.1, 158.8, 160.3$ ; MS (MALDI): found  $m/z = 3200.47$ ;  $\text{C}_{170}\text{H}_{198}\text{O}_{42}\text{S}_9$  requires 3201.09.

## 2. $^1\text{H}$ and $^{13}\text{C}$ NMR of the products.

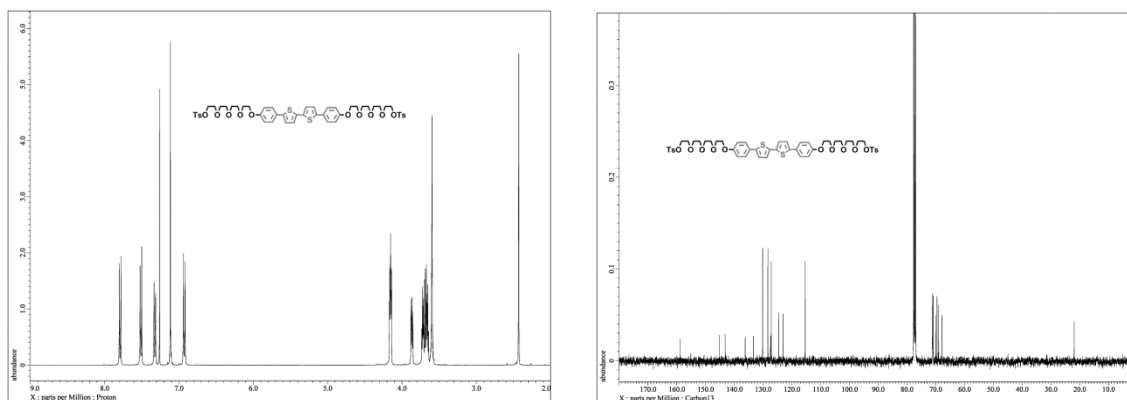

Figure S1  $^1\text{H}$  and  $^{13}\text{C}$  NMR spectra of 1mer-dTs

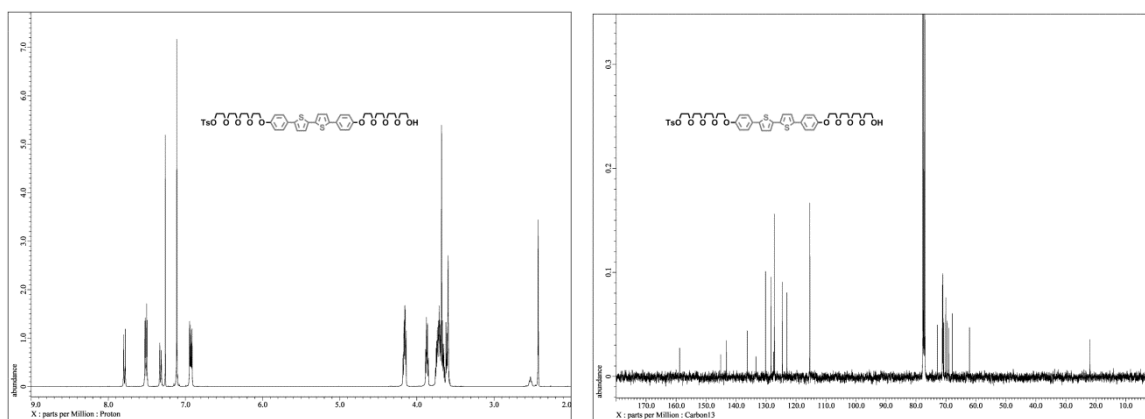

Figure S2  $^1\text{H}$  and  $^{13}\text{C}$  NMR spectra of 1mer-mTs

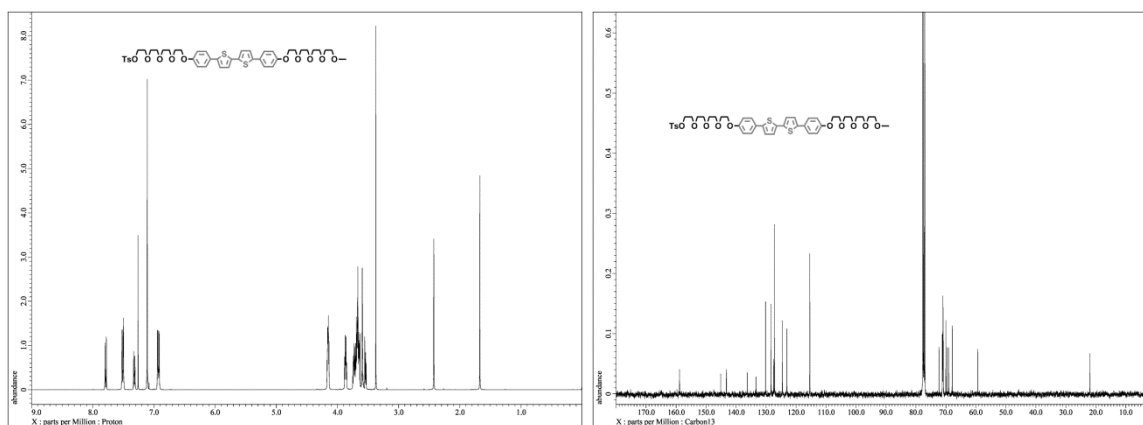

Figure S3  $^1\text{H}$  and  $^{13}\text{C}$  NMR spectra of 1mer-Ts-Ome

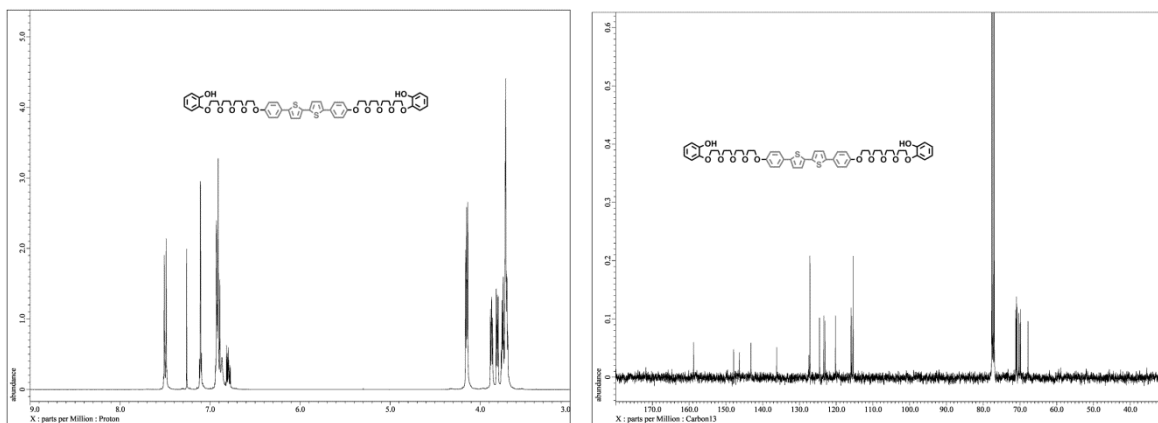

Figure S4  $^1\text{H}$  and  $^{13}\text{C}$  NMR spectra of 1mer-dCat

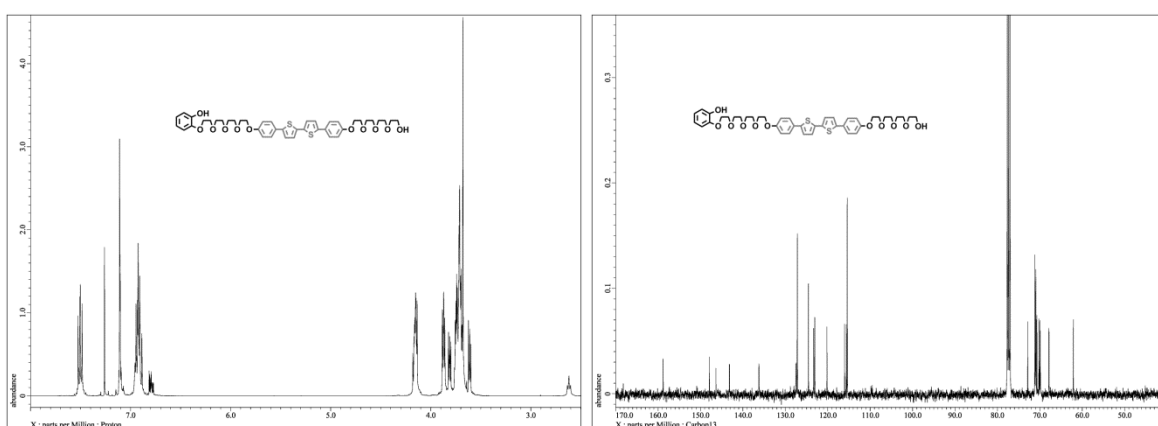

Figure S5  $^1\text{H}$  and  $^{13}\text{C}$  NMR spectra of 1mer-mCat

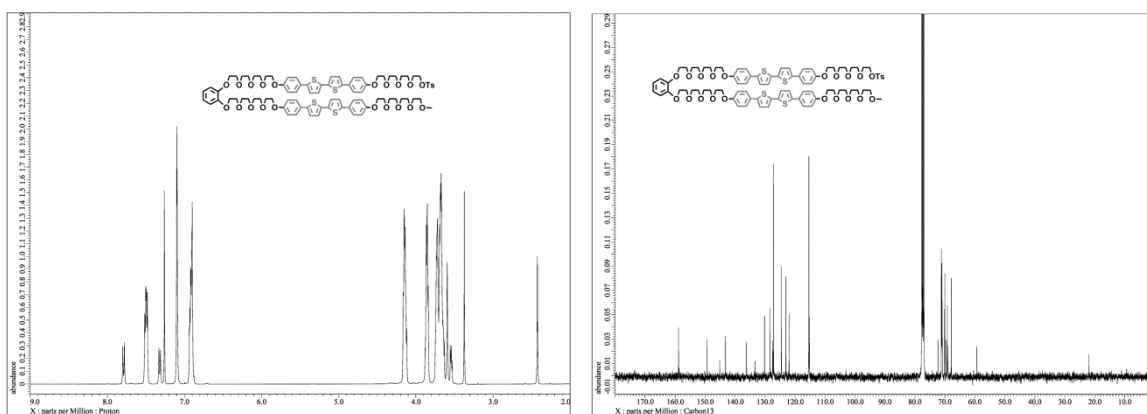

Figure S6  $^1\text{H}$  and  $^{13}\text{C}$  NMR spectra of *o*-2mer-Ts-Ome

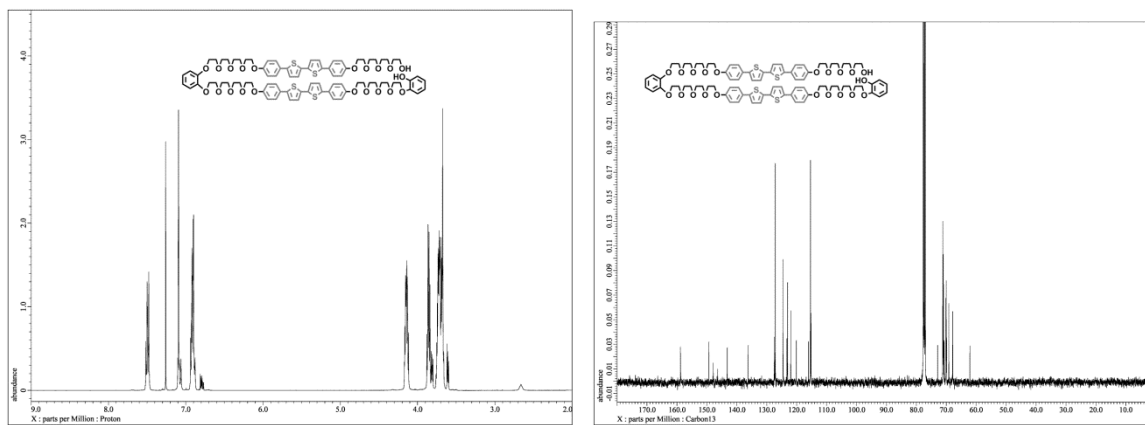

Figure S7  $^1\text{H}$  and  $^{13}\text{C}$  NMR spectra of *o*-2mer-mCat

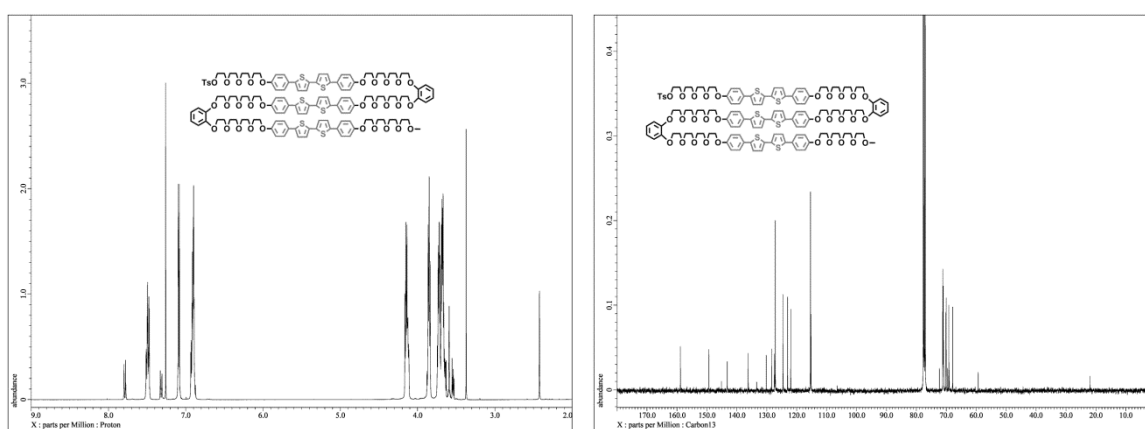

Figure S8  $^1\text{H}$  and  $^{13}\text{C}$  NMR spectra of *o*-3mer-Ts-Ome

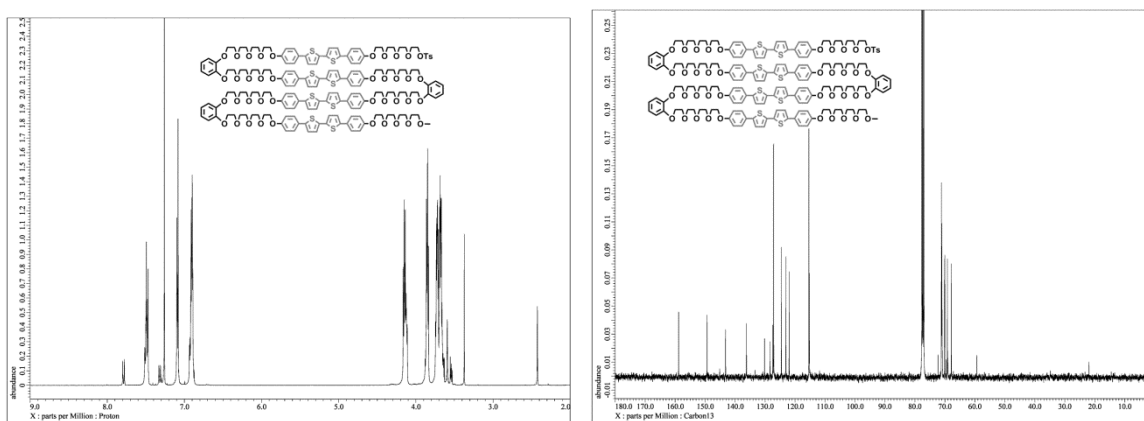

Figure S9  $^1\text{H}$  and  $^{13}\text{C}$  NMR spectra of *o*-4mer-Ts-Ome

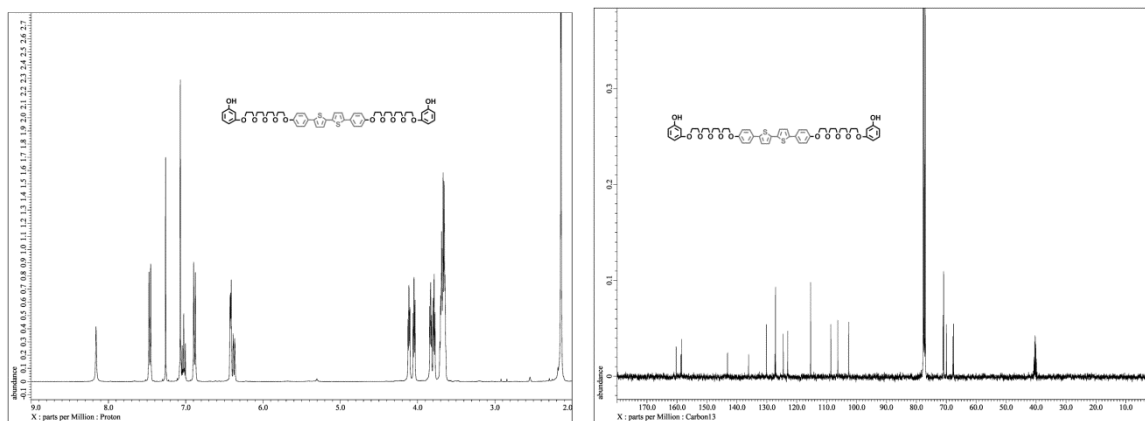

Figure S10  $^1\text{H}$  and  $^{13}\text{C}$  NMR spectra of **1mer-dRes**

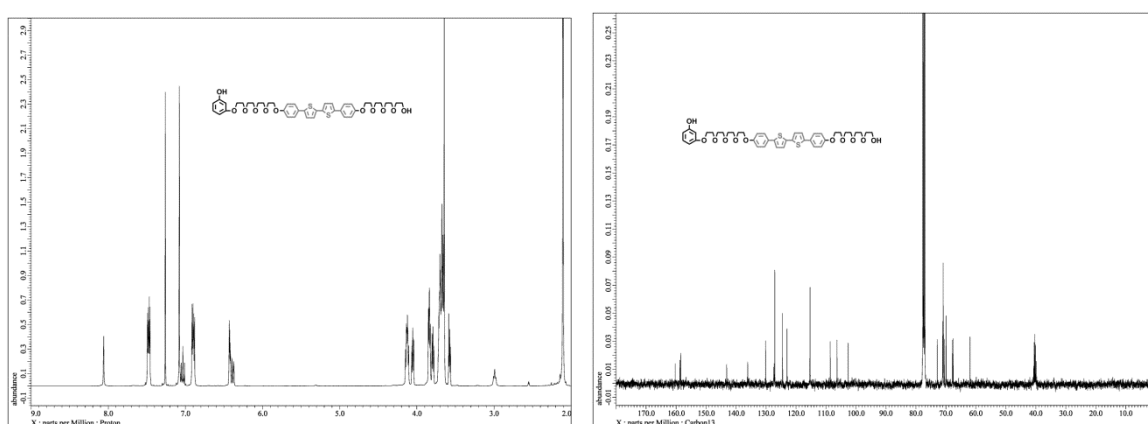

Figure S11  $^1\text{H}$  and  $^{13}\text{C}$  NMR spectra of **1mer-mRes**

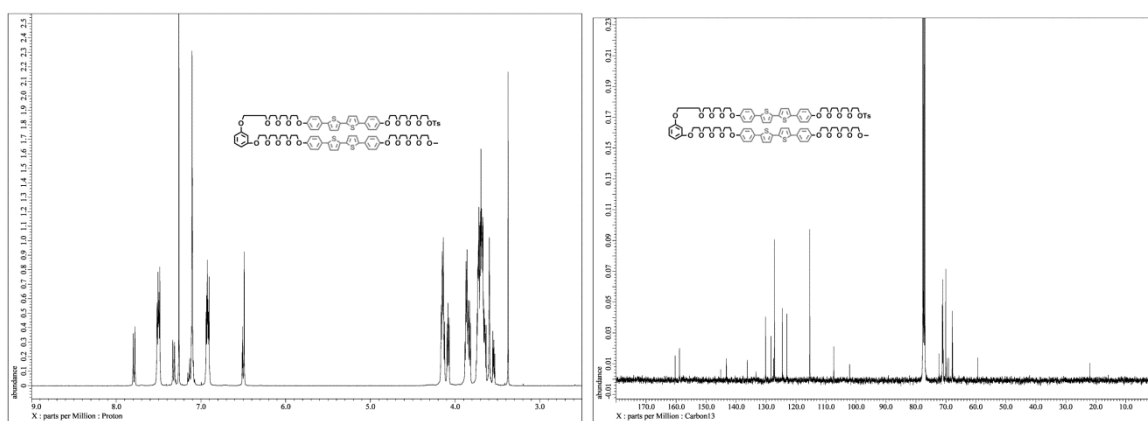

Figure S12  $^1\text{H}$  and  $^{13}\text{C}$  NMR spectra of ***m*-2mer-Ts-OMe**

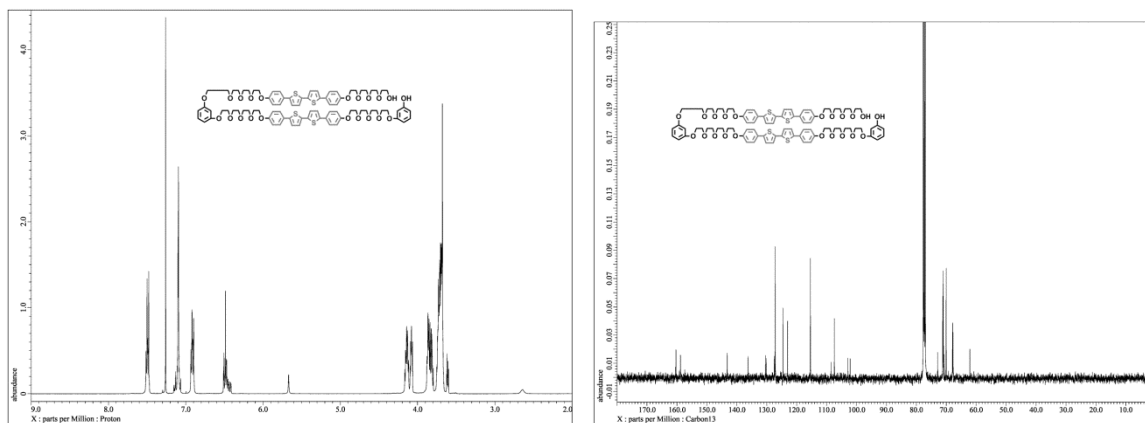

Figure S13  $^1\text{H}$  and  $^{13}\text{C}$  NMR spectra of *m*-2mer-*m*Res

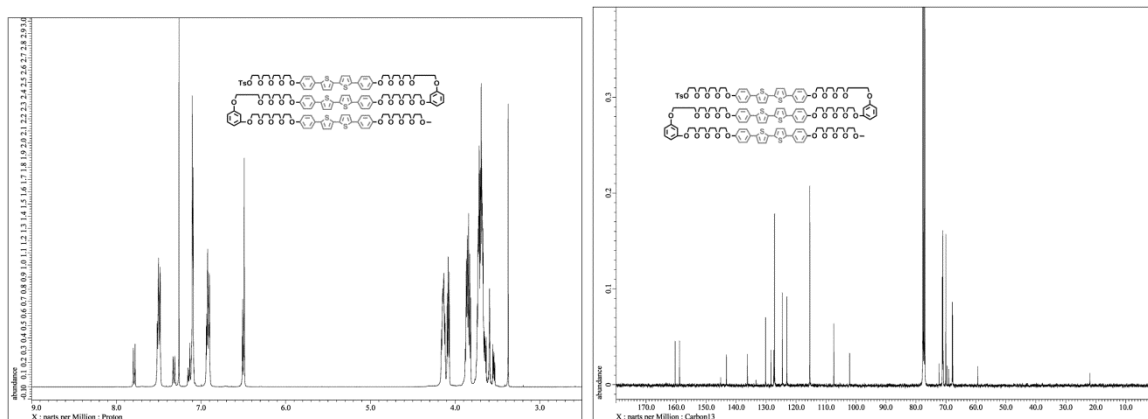

Figure S14  $^1\text{H}$  and  $^{13}\text{C}$  NMR spectra of *m*-3mer-Ts-Ome

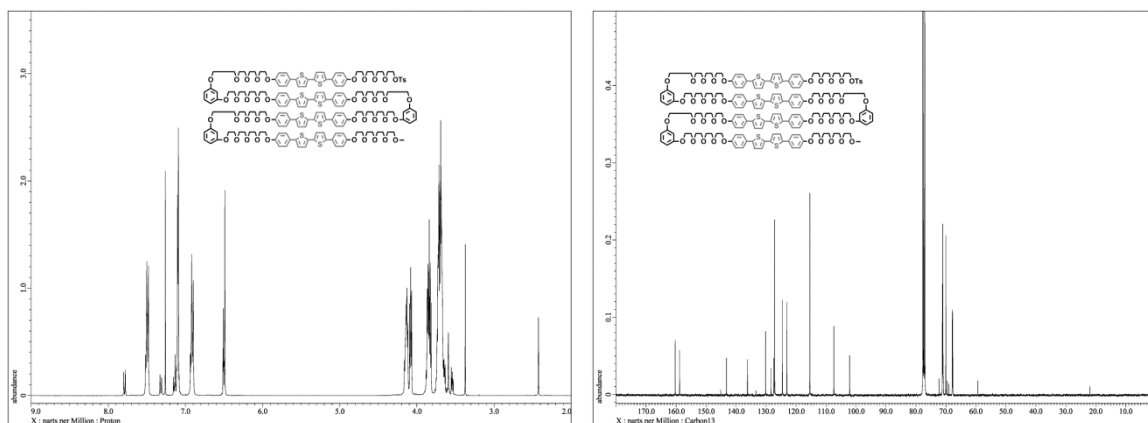

Figure S15  $^1\text{H}$  and  $^{13}\text{C}$  NMR spectra of *m*-4mer-Ts-OMe

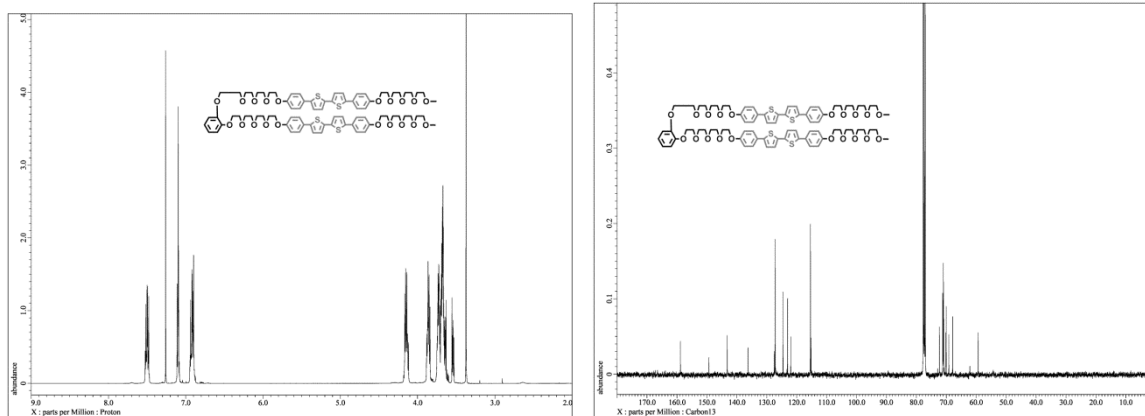

**Figure S16**  $^1\text{H}$  and  $^{13}\text{C}$  NMR spectra of *o*-2mer

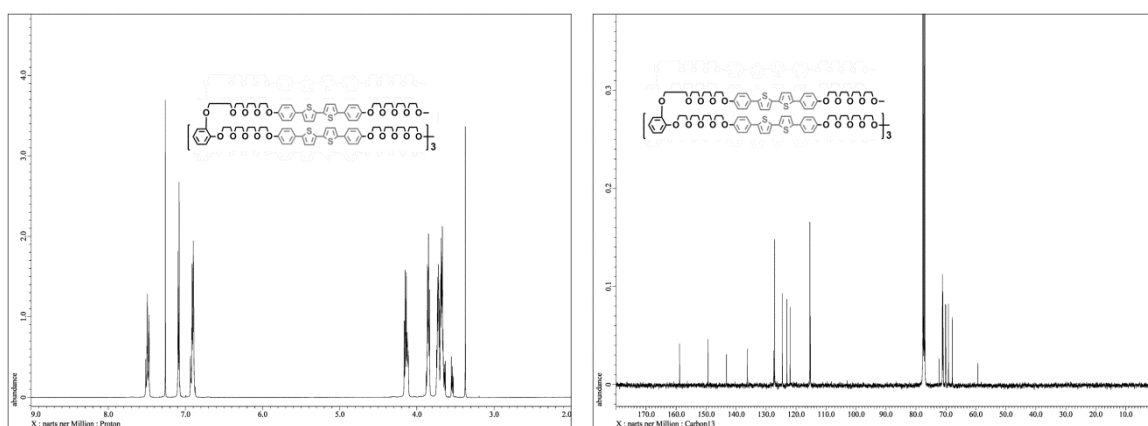

**Figure S17**  $^1\text{H}$  and  $^{13}\text{C}$  NMR spectra of *o*-4mer

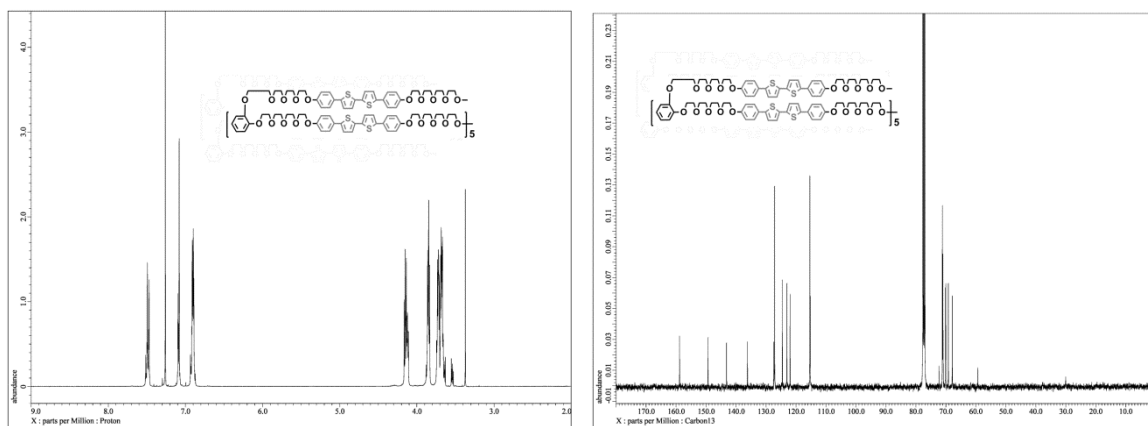

**Figure S18**  $^1\text{H}$  and  $^{13}\text{C}$  NMR spectra of *o*-6mer



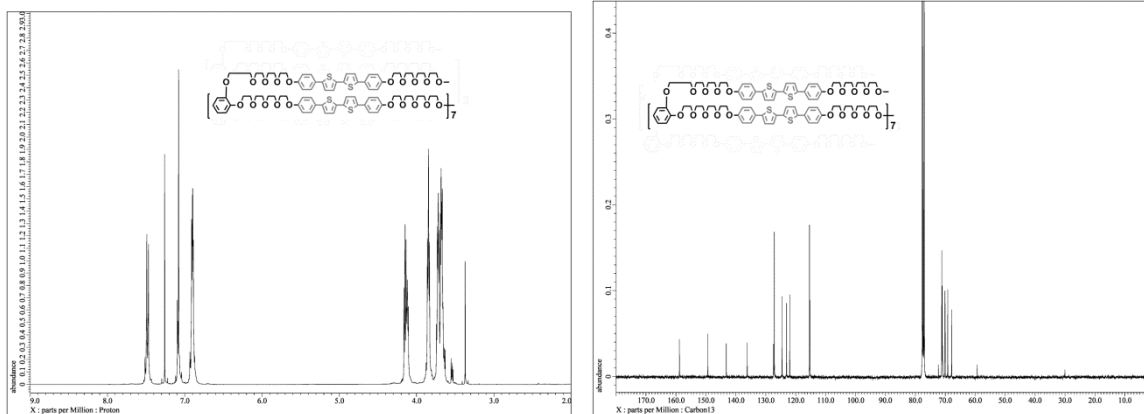

Figure S19  $^1\text{H}$  and  $^{13}\text{C}$  NMR spectra of *o*-8mer

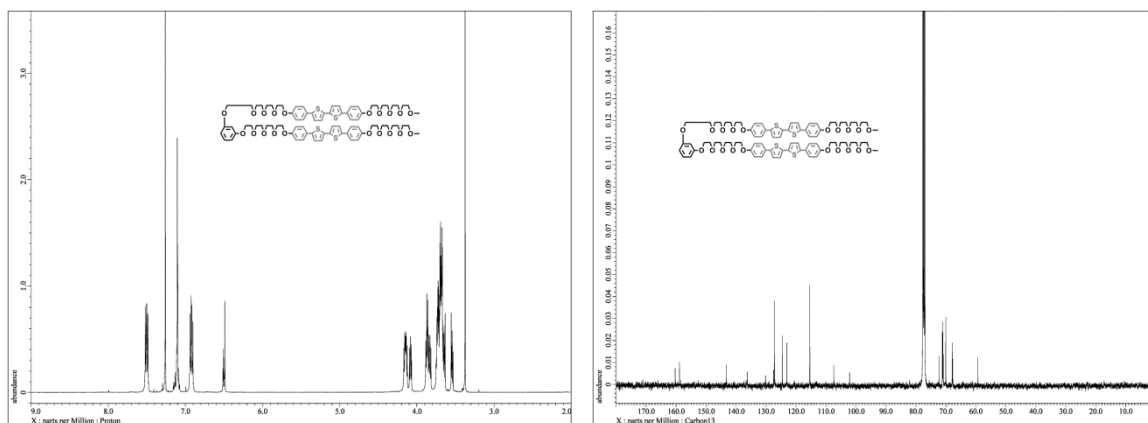

Figure S20  $^1\text{H}$  and  $^{13}\text{C}$  NMR spectra of *m*-2mer

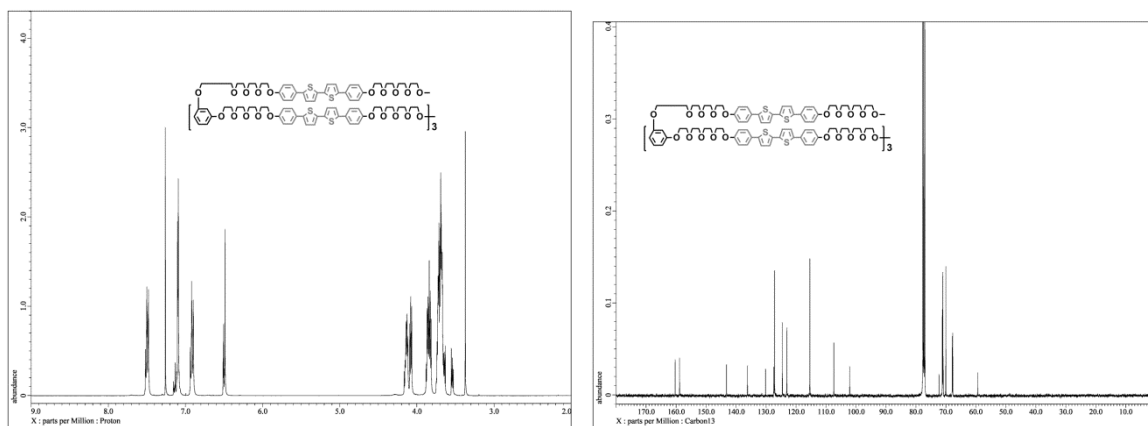

Figure S21  $^1\text{H}$  and  $^{13}\text{C}$  NMR spectra of *m*-4mer

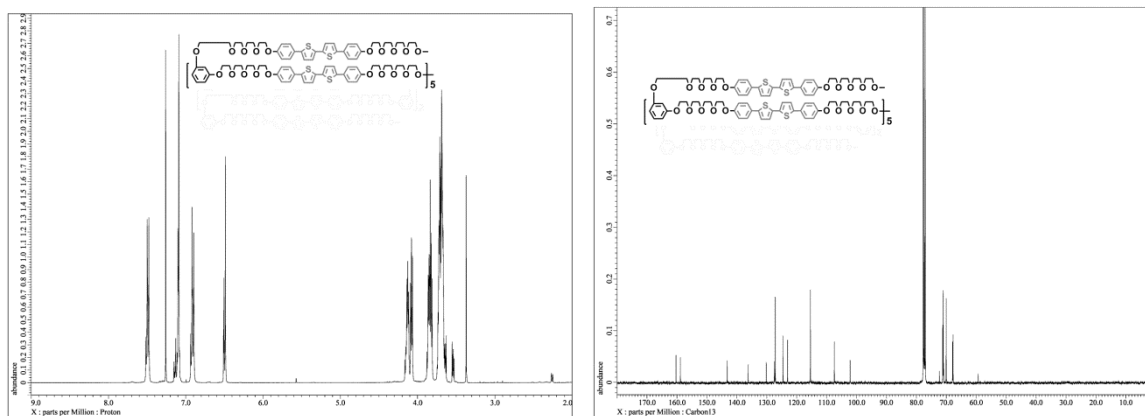

Figure S22  $^1\text{H}$  and  $^{13}\text{C}$  NMR spectra of *m*-6mer

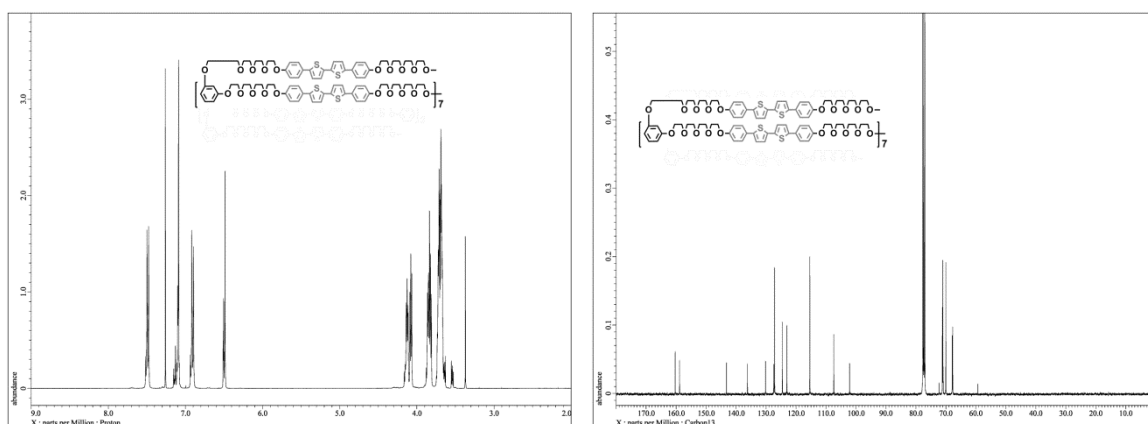

Figure S23  $^1\text{H}$  and  $^{13}\text{C}$  NMR spectra of *m*-8mer

### 3. MALDI-TOF MS of oligomers

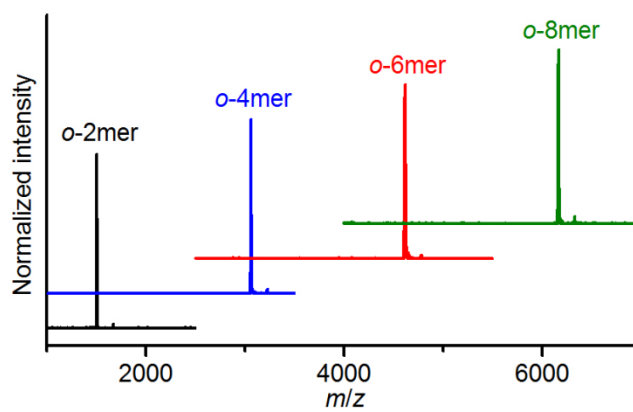

Figure S24 MALDI-TOF mass spectra of *ortho*-linked oligomers.

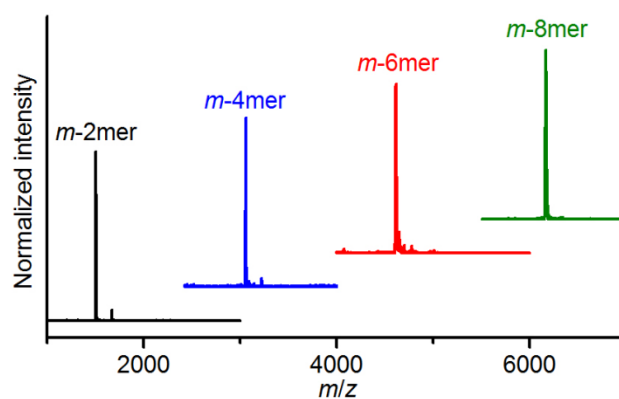

**Figure S25** MALDI-TOF mass spectra of *meta*-linked oligomers.

#### 4. Fluorescence spectra of *meta*-linked oligomers

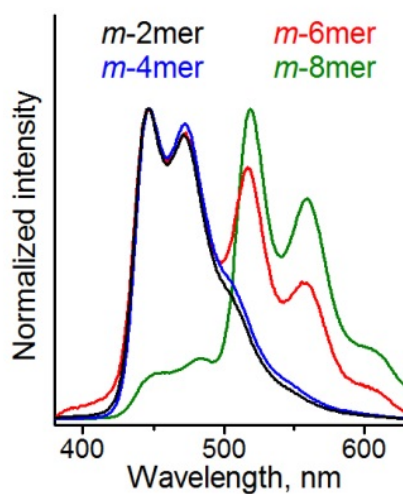

**Figure S26** Fluorescence spectra of *meta*-linked oligomers. Excitation wavelength: 326 nm.

Solvent: *o*-Dichlorobenzene. Concentration of thiophene unit:  $3.0 \times 10^{-5}$  M.

#### 5. AFM images of *o*-6mer and *m*-6mer

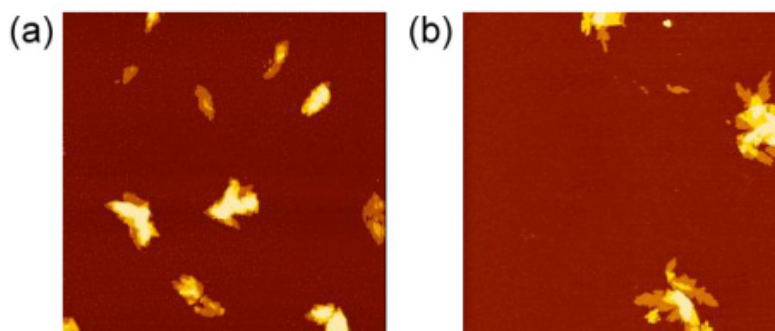

**Figure S27** AFM images of the aggregates consisting of (a) *o*-6mer and (b) *m*-6mer.

Substrate: Silicon wafer, Scan area:  $5 \mu\text{m} \times 5 \mu\text{m}$ .

## 6. FP-TRMC results of triazole-linked-8mer samples

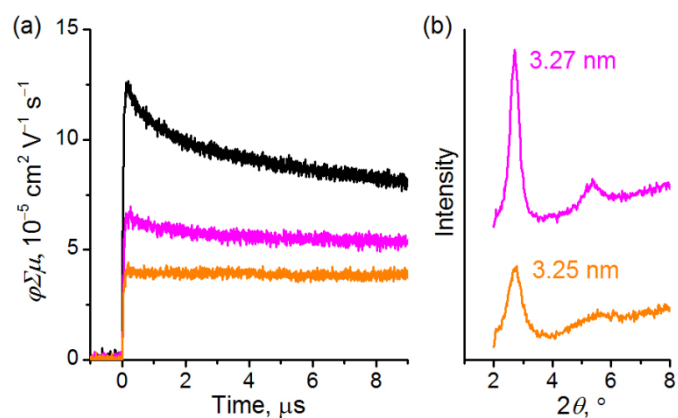

**Figure S28** (a) Kinetic traces of conductivity transient upon 355 nm photoexcitation (5 mW) for *o*-8mer (black) and triazole-linked-8mer (magenta) nanosheets, and drop-cast films of triazole-linked-8mer (orange). (b) XRD patterns of triazole-linked-8mer nanosheets (magenta) and drop-cast films of triazole-linked-8mer (orange) used in the FP-TRMC analysis. Corresponding  $d$  spacing values in nm are given at the right side of each peak.
